# Supplementary material for: ALK Inhibitor Treatment Patterns and Outcomes in Real-World Patients with ALK-Positive Non-Small-Cell Lung Cancer: A Retrospective Cohort Study
Source: PubMed Central journal article supplement — Target Oncol. 2023 Jun 21;18(4):571–83. doi: 10.1007/s11523-023-00973-7 (PMC10345061; doi:10.1007/s11523-023-00973-7), 2023-06-21
Supplement: 11523_2023_973_MOESM1_ESM.pdf [file 11523_2023_973_MOESM1_ESM.pdf]

ALK Inhibitor Treatment Patterns and Outcomes in Real-World Patients with ALK-positive Non-Small Cell Lung  
Cancer: A Retrospective Cohort Study

Michelle Wang<sup>1</sup>, Shadera Slatter<sup>1</sup>, Jesse Sussell<sup>2</sup>, Chia-Wei Lin<sup>2</sup>, Sarika Ogale<sup>2</sup>, Debajyoti Datta<sup>1</sup>, Atul J. Butte<sup>1,3</sup>,  
Lyudmila Bazhenova<sup>4</sup>, Vivek A. Rudrapatna<sup>1,5</sup>

1 Bakar Computational Health Sciences Institute, University of California San Francisco, San Francisco, California,  
USA.

2 Evidence for Access, Genentech Inc., South San Francisco, California, USA.

3 Department of Pediatrics, University of California San Francisco, San Francisco, California, USA.

4 Moores Cancer Center, University of California San Diego, La Jolla, California, USA.

5 Division of Gastroenterology, Department of Medicine, University of California San Francisco, San Francisco,  
California, USA.

Running header: Characterization of real-world use and outcomes of ALK TKI therapies.

Corresponding author:

Vivek Rudrapatna

Email: [Vivek.Rudrapatna@ucsf.edu](mailto:Vivek.Rudrapatna@ucsf.edu)

Phone: 415-443-0150

Postal Address:

UCSF Valley Tower, Box 2933 Room 21E

490 Illinois Street, Floor 2

San Francisco, CA 94143

## Supplementary Online Content

eTable 1. Definition, source, type, method for extraction or computation of all variables.

eFigure 1. The directed acyclic diagram of ALK TKI and outcomes.

eFigure 2. Adjusted survival probability estimates for alectinib and crizotinib and the forest plots of cox proportional hazard models for mAEFS, rwPFS, and OS in patients without prior systemic treatments.

eFigure 3. Adjusted survival probability estimates for alectinib and crizotinib and the forest plots of cox proportional hazard models for mAEFS, rwPFS, and OS in patients with baseline brain metastasis.

eTable 1

| Variable category | Variable name                    | Definition                                                                                                                                                                                                                                                                                                                                                                                        | Type       | Source                                           | Extraction method |
|-------------------|----------------------------------|---------------------------------------------------------------------------------------------------------------------------------------------------------------------------------------------------------------------------------------------------------------------------------------------------------------------------------------------------------------------------------------------------|------------|--------------------------------------------------|-------------------|
| Computational     | Gender                           | gender reported by patients themselves or providers                                                                                                                                                                                                                                                                                                                                               | Binary     | De-identified structured clinical data warehouse | Computational     |
|                   | Race                             | race reported by patients themselves or providers                                                                                                                                                                                                                                                                                                                                                 | Nominal    | De-identified structured clinical data warehouse | Computational     |
|                   | Charlson-Comorbidity Index Score | comorbidity index scores calculated by presence of comorbidities using ICD10 codes                                                                                                                                                                                                                                                                                                                | Ordinal    | De-identified structured clinical data warehouse | Computational     |
|                   | Distance to treatment center     | distance between patient's location to UCSF medical treatment center using zip codes                                                                                                                                                                                                                                                                                                              | Continuous | De-identified structured clinical data warehouse | Computational     |
|                   | Areas of Deprivation Index (ADI) | "represents rankings of neighborhoods by socioeconomic disadvantage in a region It includes factors for the theoretical domains of income, education, employment, and housing quality" - Kind AJH, Buckingham W. Making Neighborhood Disadvantage Metrics Accessible: The Neighborhood Atlas. New England Journal of Medicine, 2018. 378: 2456-2458. DOI: 10.1056/NEJMp1802313. PMID: PMC6051533. |            | De-identified structured clinical data warehouse | Computational     |
| Demographics      | DOB (date of birth)              | Date of subject birth                                                                                                                                                                                                                                                                                                                                                                             | Date       | UCSF electronic health record                    | Manual            |
|                   | Sex                              | Subject sex at birth                                                                                                                                                                                                                                                                                                                                                                              | Binary     | UCSF electronic health record                    | Manual            |

|                         |                               |                                                                             |            |                               |        |
|-------------------------|-------------------------------|-----------------------------------------------------------------------------|------------|-------------------------------|--------|
|                         | Insurance                     | Medical insurance assigned to subject in UCSF health record                 | Nominal    | UCSF electronic health record | Manual |
|                         | Copay                         | Financial copay documented for initial ALKi                                 | Continuous | UCSF electronic health record | Manual |
|                         | Smoking status                | Current; former; never; unknown                                             | Nominal    | UCSF electronic health record | Manual |
|                         | ECOG Status                   | ECOG performance status within 3 months prior to ALKi initiation            | Ordinal    | UCSF electronic health record | Manual |
|                         | ECOG Date                     | Date associated with reported ECOG performance status                       | Date       | UCSF electronic health record | Manual |
|                         | ALKi Rendering Physician      | Oncologist physician providing care at the time of ALKi initiation          | Nominal    | UCSF electronic health record | Manual |
|                         | ALKi Rendering Physician NPI  | NPI number associated with ALKi rendering physician                         | Nominal    | UCSF electronic health record | Manual |
| Disease Characteristics | Date of NSCLC Diagnosis       | Date associated with biopsy confirmed diagnosis of NSCLC                    | Date       | UCSF electronic health record | Manual |
|                         | Stage of NSCLC                | Cancer staging at the time of diagnosis of NSCLC                            | Ordinal    | UCSF electronic health record | Manual |
|                         | TNM Staging at time of ALKi   | Full clinical staging diagnosed at the time of ALKi initiation              | Ordinal    | UCSF electronic health record | Manual |
|                         | Date of ALK tissue collection | Date in which sample was collected for use in ALK testing                   | Date       | UCSF electronic health record | Manual |
|                         | Date of ALK test reported     | Date on the pathology/genetic report for ALK finding                        | Date       | UCSF electronic health record | Manual |
|                         | Type of ALK test              | FISH (fluorescence in situ hybridization); NGS (next generation sequencing) | Binary     | UCSF electronic health record | Manual |

|                  |                                                  |                                                                                                                  |          |                               |        |
|------------------|--------------------------------------------------|------------------------------------------------------------------------------------------------------------------|----------|-------------------------------|--------|
|                  | Sample for ALK test                              | Sample collected for ALK testing - tissue biopsy; blood; fluid                                                   | Nominal  | UCSF electronic health record | Manual |
|                  | ALK Fusion Partner                               | Fusion partner reported on ALK testing                                                                           | Nominal  | UCSF electronic health record | Manual |
|                  | ALK Fusion Variant                               | Fusion variant reported on ALK testing                                                                           | Nominal  | UCSF electronic health record | Manual |
|                  | Co-Mutations                                     | Co-mutations noted during FISH/NGS testing                                                                       | Nominal  | UCSF electronic health record | Manual |
|                  | Metastasis characterization at baseline          | Metastases acquired by subject at the time of ALKi initiation                                                    | Nominal  | UCSF electronic health record | Manual |
|                  | Metastasis characterization acquired during ALKi | New metastases acquired by subject while on ALKi therapy                                                         | Nominal  | UCSF electronic health record | Manual |
|                  | If Brain - # of Mets                             | If brain mets are reported - the number of brain metastases at the time of diagnosis of brain metastatic disease | Discrete | UCSF electronic health record | Manual |
|                  | Histology                                        | squamous cell carcinoma; adenocarcinoma; large cell carcinoma; other                                             | Nominal  | UCSF electronic health record | Manual |
|                  | De novo status                                   | Yes/no - first occurrence of cancer diagnosis                                                                    | Binary   | UCSF electronic health record | Manual |
| Prior Treatments | Prior treatment                                  | Yes/no - prior treatment to ALKi documented                                                                      | Binary   | UCSF electronic health record | Manual |
|                  | Prior treatment drug                             | Drug or treatment provided to subject prior to ALKi therapy - chemotherapy; immunotherapy; radiation; surgery    | Nominal  | UCSF electronic health record | Manual |
|                  | Prior treatment onset date                       | Date of initiation of prior treatment                                                                            | Date     | UCSF electronic health record | Manual |

|                         |                                      |                                                                                                                               |          |                               |        |
|-------------------------|--------------------------------------|-------------------------------------------------------------------------------------------------------------------------------|----------|-------------------------------|--------|
|                         | Prior treatment end date             | Date of cessation of prior treatment                                                                                          | Date     | UCSF electronic health record | Manual |
|                         | Prior LOT                            | Line of therapy in which prior therapy was documented                                                                         | Ordinal  | UCSF electronic health record | Manual |
|                         | Prior dose                           | Dose of prior therapy prescribed                                                                                              | Discrete | UCSF electronic health record | Manual |
|                         | Prior frequency                      | Frequency of prior therapy prescribed                                                                                         | Ordinal  | UCSF electronic health record | Manual |
|                         | If radiation - location of treatment | If targeted radiation is a prior therapy - location in which targeted radiation was completed                                 | Nominal  | UCSF electronic health record | Manual |
|                         | Past clinical trial                  | Yes/no - participation in previous clinical trial for NSCLC treatment                                                         | Binary   | UCSF electronic health record | Manual |
| ALK inhibitor treatment | ALKi used                            | Initial ALKi prescribed and taken by subject for treatment of NSCLC. Crizotinib; Alectinib; Ceritinib; Brigatinib; Lorlatinib | Nominal  | UCSF electronic health record | Manual |
|                         | Date of onset of ALKi Treatment      | Date of initiation of ALKi therapy                                                                                            | Date     | UCSF electronic health record | Manual |
|                         | Date of end of ALKi Treatment        | Date of cessation of ALKi therapy                                                                                             | Date     | UCSF electronic health record | Manual |
|                         | ALKi LOT                             | Line of therapy of initial ALKi in relation to prior therapies used for treatment of NSCLC                                    | Ordinal  | UCSF electronic health record | Manual |
|                         | ALKi dose                            | Originally prescribed dose at the initiation of ALKi therapy                                                                  | Discrete | UCSF electronic health record | Manual |
|                         | ALKi frequency                       | Originally prescribed frequency at the initiation of ALKi therapy                                                             | Ordinal  | UCSF electronic health record | Manual |

|                      |                              |                                                                                                                           |         |                               |        |
|----------------------|------------------------------|---------------------------------------------------------------------------------------------------------------------------|---------|-------------------------------|--------|
| Regimen adjustment   | Dose adjustment              | Yes/no - clinical notation of change in dosage and/or frequency of ALKi therapy                                           | Binary  | UCSF electronic health record | Manual |
|                      | Date of dose adjustment      | Date in which ALKi therapy dosage and/or frequency was changed                                                            | Date    | UCSF electronic health record | Manual |
|                      | Original dose                | Current prescribed dose/frequency of ALKi at the time of dose adjustment                                                  | Ordinal | UCSF electronic health record | Manual |
|                      | New dose                     | New dose/frequency prescription of ALKi                                                                                   | Ordinal | UCSF electronic health record | Manual |
|                      | Reason for dose adjustment   | Clinically documented reason for dose adjustment                                                                          | Nominal | UCSF electronic health record | Manual |
| Regimen interruption | Regimen Interruption         | Yes/no - clinical notation of interruption of ALKi therapy                                                                | Binary  | UCSF electronic health record | Manual |
|                      | Date of Regimen Interruption | Date in which ALKi therapy was paused                                                                                     | Date    | UCSF electronic health record | Manual |
|                      | Date of Regimen Restart      | Date in which ALKi therapy was resumed                                                                                    | Date    | UCSF electronic health record | Manual |
|                      | Reason for Interruption      | Clinically documented reason for regimen interruption                                                                     | Nominal | UCSF electronic health record | Manual |
|                      | If Adverse Event RI          | If adverse event - clinical notation of adverse event that caused an interruption in ALKi therapy                         | Nominal | UCSF electronic health record | Manual |
|                      | If Disease Progression RI    | If disease progression - type of imaging used to document disease progression that caused an interruption in ALKi therapy | Nominal | UCSF electronic health record | Manual |
|                      | If other Interruption        | If other - clinical notation of other event that caused an interruption in ALKi therapy                                   | Nominal | UCSF electronic health record | Manual |
| Ancillary treatment  | Ancillary treatment          | Yes/no - clinical notation of ancillary treatment                                                                         | Binary  | UCSF electronic               | Manual |

|                           |                                      |                                                                                                                           |          |                               |        |
|---------------------------|--------------------------------------|---------------------------------------------------------------------------------------------------------------------------|----------|-------------------------------|--------|
|                           |                                      | prescribed while on initial ALKi therapy                                                                                  |          | health record                 |        |
|                           | Ancillary treatment drug             | Name of drug or treatment provided concurrently with ALKi therapy - chemotherapy; immunotherapy; radiation; surgery       | Nominal  | UCSF electronic health record | Manual |
|                           | Ancillary treatment onset date       | Date of initiation of ancillary treatment                                                                                 | Date     | UCSF electronic health record | Manual |
|                           | Ancillary treatment end date         | Date of cessation of ancillary treatment                                                                                  | Date     | UCSF electronic health record | Manual |
|                           | Ancillary dose                       | Originally prescribed dose at the initiation of ancillary treatment                                                       | Discrete | UCSF electronic health record | Manual |
|                           | Ancillary frequency                  | Originally prescribed frequency at the initiation of ancillary treatment                                                  | Ordinal  | UCSF electronic health record | Manual |
|                           | If radiation - location of treatment | If targeted radiation is an ancillary treatment - location in which targeted radiation was completed                      | Nominal  | UCSF electronic health record | Manual |
| Treatment discontinuation | Treatment discontinuation            | Yes/no - clinical notation of ALKi treatment discontinuation                                                              | Binary   | UCSF electronic health record | Manual |
|                           | Date of treatment discontinuation    | Date of cessation of ALKi therapy                                                                                         | Date     | UCSF electronic health record | Manual |
|                           | Reason for discontinuation           | Clinically documented reason for treatment discontinuation                                                                | Nominal  | UCSF electronic health record | Manual |
|                           | If Adverse Event TD                  | If adverse event - clinical notation of adverse event that caused discontinuation of ALKi therapy                         | Nominal  | UCSF electronic health record | Manual |
|                           | If Disease Progression TD            | If disease progression - type of imaging used to document disease progression that caused discontinuation of ALKi therapy | Nominal  | UCSF electronic health record | Manual |



|                        |                           |                                                                                                                             |         |                               |        |
|------------------------|---------------------------|-----------------------------------------------------------------------------------------------------------------------------|---------|-------------------------------|--------|
|                        | If other discontinuation  | If other - clinical notation of other event that caused discontinuation of ALKi therapy                                     | Nominal | UCSF electronic health record | Manual |
| Next treatment         | Next treatment            | Yes/no - clinical notation of next treatment following ALKi therapy                                                         | Binary  | UCSF electronic health record | Manual |
|                        | Next treatment drug       | Name of drug or treatment provided subsequent to ALKi therapy - chemotherapy; immunotherapy; radiation; surgery             | Nominal | UCSF electronic health record | Manual |
|                        | Next treatment onset date | Date of initiation of next treatment                                                                                        | Date    | UCSF electronic health record | Manual |
| Serious adverse events | AE - primary diagnosis    | Discharge diagnoses for any hospitalization event while on ALKi therapy                                                     | Nominal | UCSF electronic health record | Manual |
|                        | Encounter                 | Type of encounter for SAE - hospitalization                                                                                 | Nominal | UCSF electronic health record | Manual |
|                        | Date                      | Date of admission to hospital for SAE                                                                                       | Date    | UCSF electronic health record | Manual |
| Other                  | Last Date of Observation  | If no ALKi treatment discontinuation record - Date of the last clinical record confirming ongoing treatment of ALKi therapy | Date    | UCSF electronic health record | Manual |
|                        | Encounter type            | If last date of observation - type of encounter confirming ongoing treatment of ALKi therapy                                | Nominal | UCSF electronic health record | Manual |
|                        | Seen as consult           | Yes/no - receiving primary care of NSCLC outside of UCSF system at the time of ALKi initiation                              | Binary  | UCSF electronic health record | Manual |
|                        | If Deceased Date          | Date of death as documented in UCSF electronic health record                                                                | Date    | UCSF electronic health record | Manual |
| Exclusion              | Exclude                   | Yes/no - exclude based on inclusion/exclusion criteria as detailed in manuscript                                            | Binary  | UCSF electronic health record | Manual |

|  |                            |                                                                                          |         |                               |        |
|--|----------------------------|------------------------------------------------------------------------------------------|---------|-------------------------------|--------|
|  | Exclude Reason             | Reason for exclusion from study after manual review                                      | Nominal | UCSF electronic health record | Manual |
|  | If ALK Negative - mutation | If no ALK mutation - documentation of other significant mutation/s associated with NSCLC | Nominal | UCSF electronic health record | Manual |
|  | If No NSCLC                | If no NSCLC - diagnosis of other cancer as related to ALKi therapy                       | Nominal | UCSF electronic health record | Manual |
|  | Excluded first ALKi given  | If excluded - initial ALKi prescribed to the subject for treatment                       | Nominal | UCSF electronic health record | Manual |

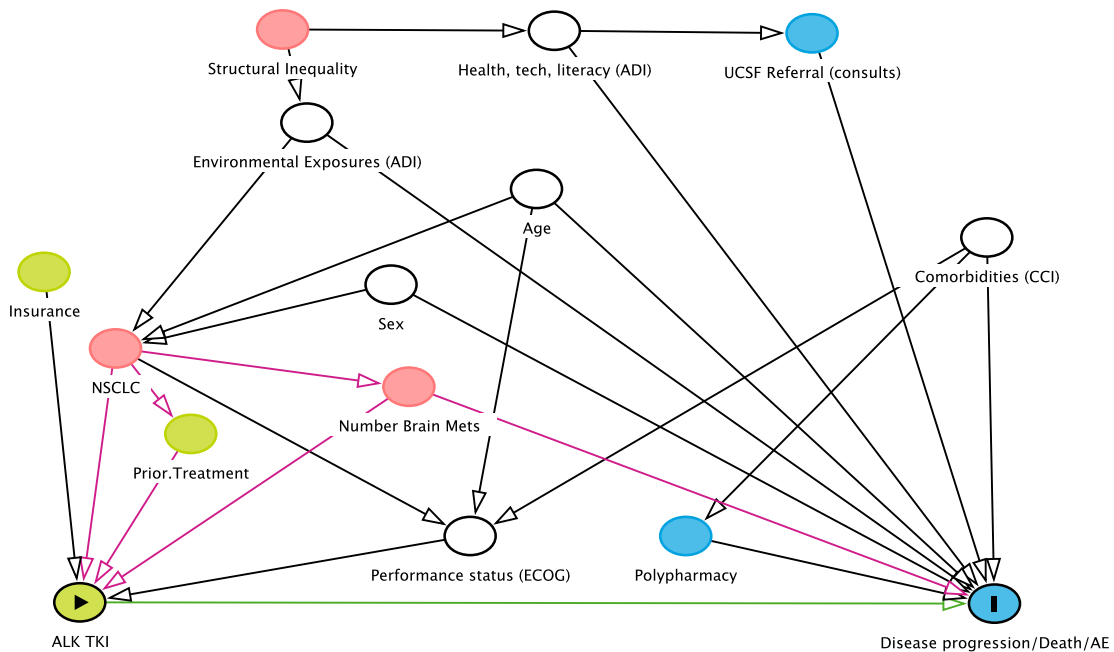

Figure 1 The directed acyclic diagram of ALK TKI and outcomes.

DAG codes:

dag {

"ALK TKI" [exposure,pos="-1.388,1.386"]

"Comorbidities (CCI)" [adjusted,pos="-0.165,-0.250"]

"Disease progression/Death/AE" [outcome,pos="-0.154,1.392"]

"Environmental Exposures (ADI)" [adjusted,pos="-1.082,-0.764"]

"Health, tech, literacy (ADI)" [adjusted,pos="-0.748,-1.176"]

"Number Brain Mets" [pos="-0.944,0.420"]

"Performance status (ECOG)" [adjusted,pos="-0.862,1.089"]

"Structural Inequality" [pos="-1.115,-1.182"]

"UCSF Referral (consults)" [pos="-0.401,-1.164"]

Age [adjusted,pos="-0.772,-0.467"]

Insurance [pos="-1.437,-0.095"]

NSCLC [pos="-1.340,0.248"]

Polypharmacy [pos="-0.571,1.089"]

Prior.Treatment [pos="-1.239,0.631"]

Sex [adjusted,pos="-0.968,-0.038"]

"ALK TKI" -> "Disease progression/Death/AE"

"Comorbidities (CCI)" -> "Disease progression/Death/AE"

"Comorbidities (CCI)" -> "Performance status (ECOG)"

"Comorbidities (CCI)" -> Polypharmacy

"Environmental Exposures (ADI)" -> "Disease progression/Death/AE"

"Environmental Exposures (ADI)" -> NSCLC  
"Health, tech, literacy (ADI)" -> "Disease progression/Death/AE"  
"Health, tech, literacy (ADI)" -> "UCSF Referral (consults)"  
"Number Brain Mets" -> "ALK TKI"  
"Number Brain Mets" -> "Disease progression/Death/AE"  
"Performance status (ECOG)" -> "ALK TKI"  
"Structural Inequality" -> "Environmental Exposures (ADI)"  
"Structural Inequality" -> "Health, tech, literacy (ADI)"  
"UCSF Referral (consults)" -> "Disease progression/Death/AE"  
Age -> "Disease progression/Death/AE"  
Age -> "Performance status (ECOG)"  
Age -> NSCLC  
Insurance -> "ALK TKI"  
NSCLC -> "ALK TKI"  
NSCLC -> "Number Brain Mets"  
NSCLC -> "Performance status (ECOG)"  
NSCLC -> Prior.Treatment  
Polypharmacy -> "Disease progression/Death/AE"  
Prior.Treatment -> "ALK TKI"  
Sex -> "Disease progression/Death/AE"  
Sex -> NSCLC  
}

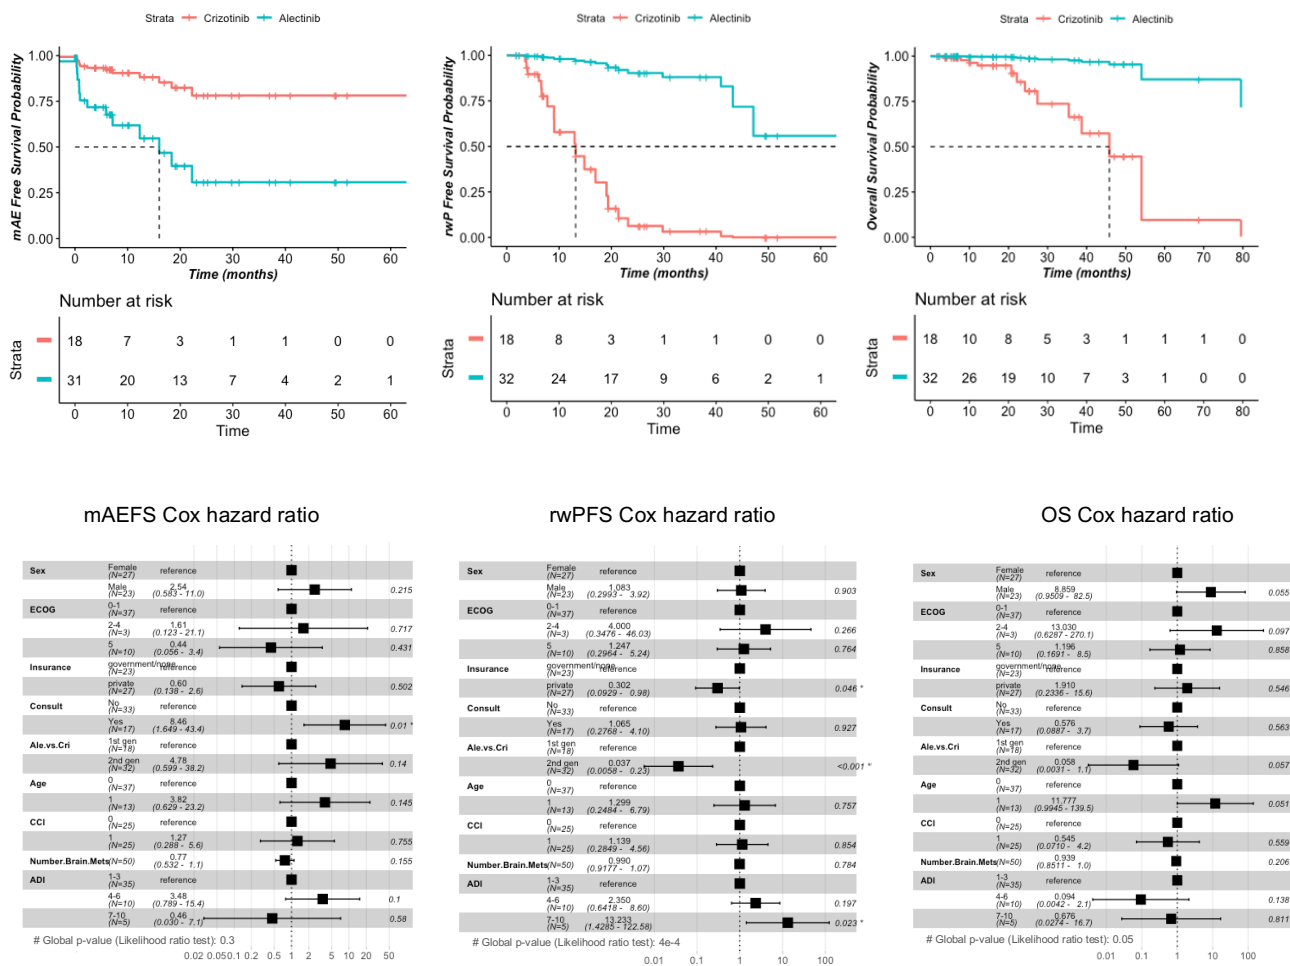

eFigure 2 Adjusted survival probability estimates for alectinib and crizotinib and the forest plots of cox proportional hazard models for mAEFS, rwPFS, and OS in patients without prior systemic treatments.

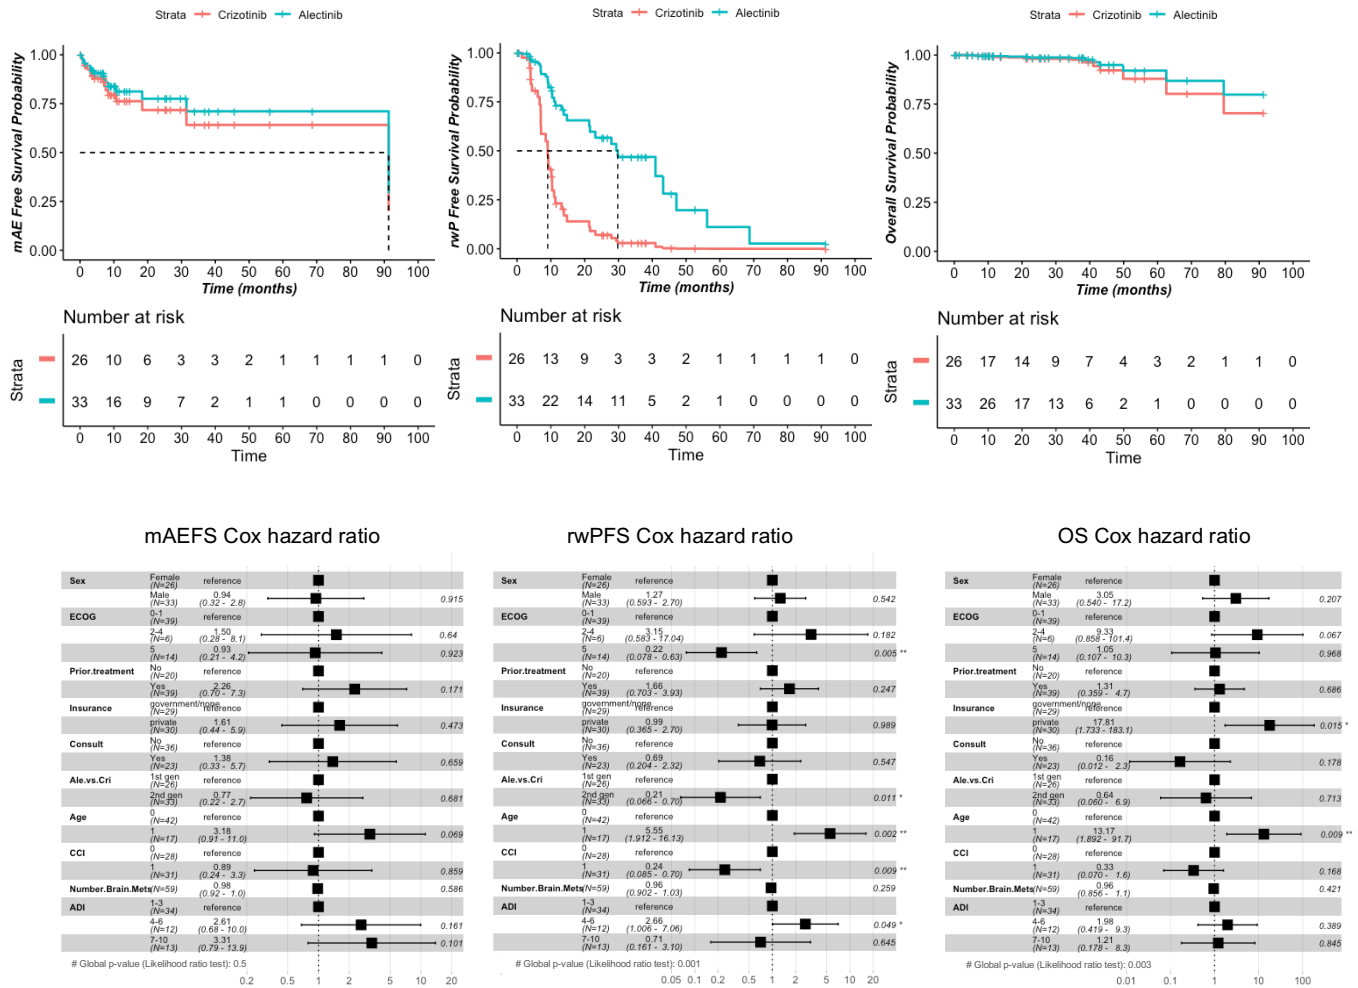

eFigure 3 Adjusted survival probability estimates for alectinib and crizotinib and the forest plots of cox proportional hazard models for mAEFS, rwPFS, and OS in patients with baseline brain metastasis.
